# Supplementary material for: 25 years of maturation: A systematic review of RNAi in the clinic
Source: PubMed Central journal article supplement — Mol Ther Nucleic Acids. 2023 Jul 18;33:469–82. doi: 10.1016/j.omtn.2023.07.018 (PMC10424002; doi:10.1016/j.omtn.2023.07.018), 2023-07-18
Supplement: mmc1.pdf [file mmc1.pdf]

**OMTN, Volume 33**

## **Supplemental information**

**25 years of maturation:**

### **A systematic review of RNAi in the clinic**

**Ida Juhl Corydon, Bjørn Kristensen Fabian-Jessing, Thomas Stax Jakobsen, Asbjørn Cortnum Jørgensen, Emilie Grarup Jensen, Anne Louise Askou, Lars Aagaard, and Thomas Juhl Corydon**

## Supplemental Materials

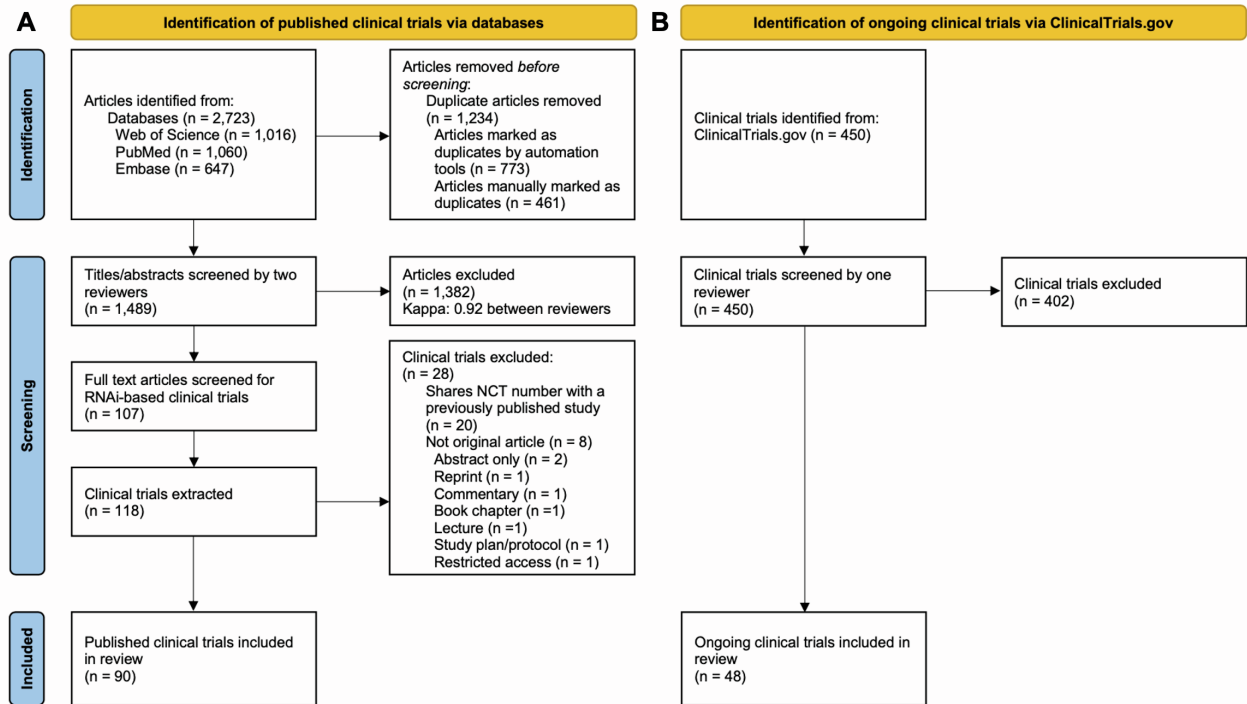

**Figure S1: Flow diagram of the selection process. (A)** Published clinical trials included in this review. **(B)** Ongoing clinical trials included in this review. *Adapted from:* Page MJ, McKenzie JE, Bossuyt PM, Boutron I, Hoffmann TC, Mulrow CD, et al. The PRISMA 2020 statement: an updated guideline for reporting systematic reviews.<sup>1</sup>

**A****SC administration grouped by delivery platform**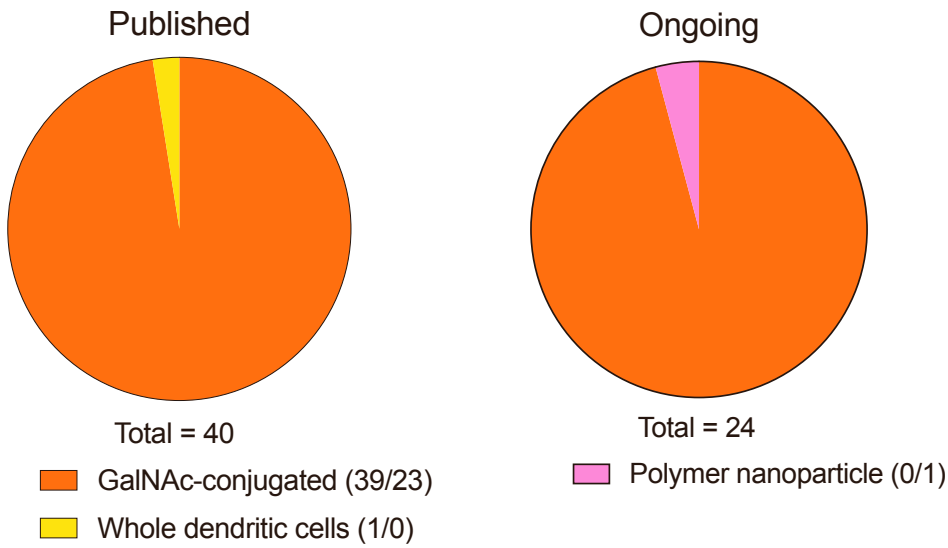**B****IV administration grouped by delivery platform**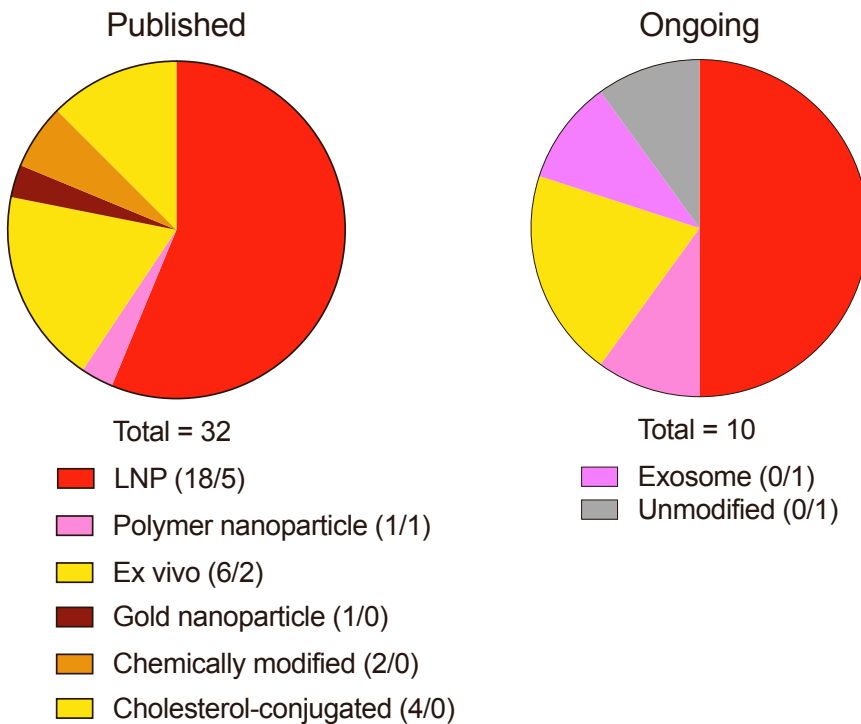

**Figure S2: SC or IV administration grouped by delivery platform. (A-B)** Overall distribution of the types of delivery platforms used in combination with SC or IV administration in the published/ongoing clinical trials. Color coded annotations are included for every distribution.

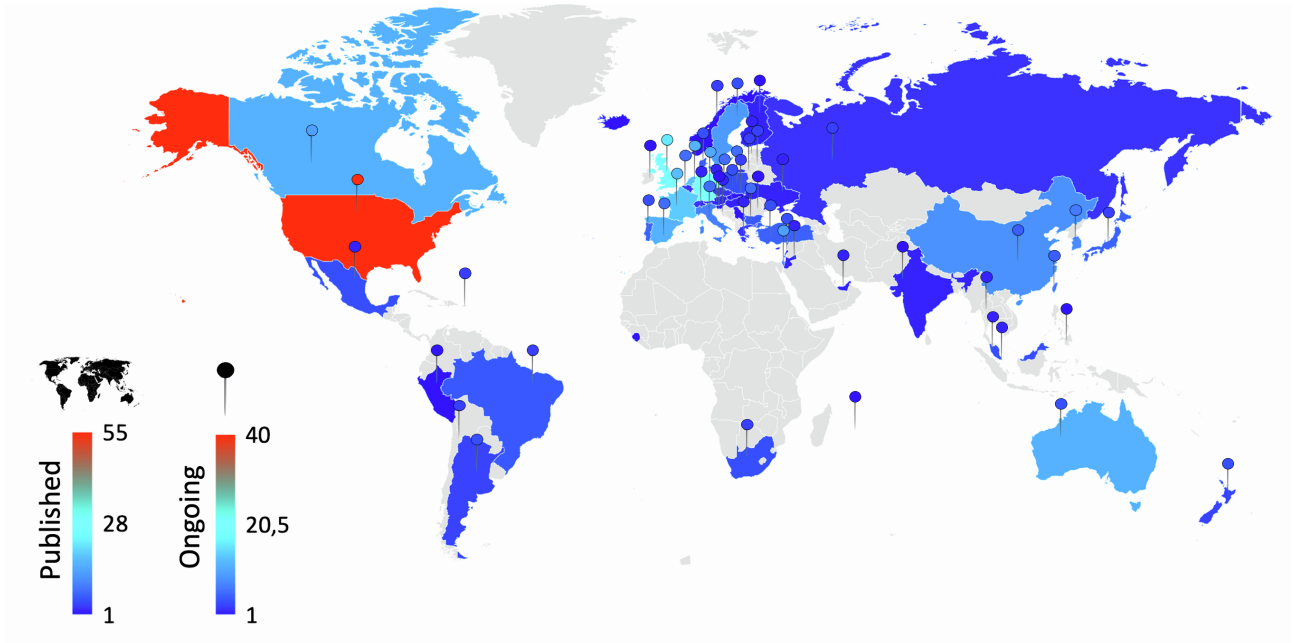

**Figure S3: The world of clinical RNAi.** Heat map showing the countries from where the patients of the published and ongoing RNAi-based clinical trials have been or are being recruited from. Color-coded annotations are included on the left side. “Red” correlates with the highest number of studies recruiting patients from the involved country, whereas “dark blue” correlates with the lowest number of studies. Grey color indicate that no patients were recruited from the involved country. The countries involved in the published clinical trials are represented by the color on the map, whereas the countries involved in the ongoing clinical trials are represented by the colors on the pins on the map.

**Table S1: Overview of the included published clinical trials.** Characteristics of the 90 published clinical trials included in this review. The \* indicates that the NCT number was not found in the article, but was found manually by the reviewers, who screened the clinical trials. The - indicates that no NCT was found in the article nor manually.

| <b>Nr.</b> | <b>Name of first author</b> | <b>Title</b>                                                                                                                                                    | <b>Year of publication</b> | <b>NCT</b>  |
|------------|-----------------------------|-----------------------------------------------------------------------------------------------------------------------------------------------------------------|----------------------------|-------------|
| 1          | DeVincenzo, John            | Evaluation of the safety, tolerability and pharmacokinetics of ALN-RSV01, a novel RNAi antiviral therapeutic directed against respiratory syncytial virus (RSV) | 2008                       | -           |
| 2          | Wyszko, Eliza               | A multivariate analysis of patients with brain tumors treated with ATN-RNA                                                                                      | 2008                       | -           |
| 3          | DeVincenzo, John            | A randomized, double-blind, placebo-controlled study of an RNAi-based therapy directed against respiratory syncytial virus                                      | 2010                       | NCT00496821 |
| 4          | DiGiusto, David L.          | RNA-Based Gene Therapy for HIV With Lentiviral Vector-Modified CD34(+) Cells in Patients Undergoing Transplantation for AIDS-Related Lymphoma                   | 2010                       | -           |
| 5          | Leachman, Sancy A.          | First-in-human Mutation-targeted siRNA Phase Ib Trial of an Inherited Skin Disorder                                                                             | 2010                       | NCT00716014 |
| 6          | Kaiser, Peter K.            | RNAi-Based Treatment for Neovascular Age-Related Macular Degeneration by Sirna-027                                                                              | 2010                       | NCT00363714 |
| 7          | Gish, Robert G              | RNA interference and its potential applications to chronic HBV treatment: results of a Phase I safety and tolerability study                                    | 2011                       | -           |
| 8          | Zamora, Martin R.           | RNA Interference Therapy in Lung Transplant Patients Infected with Respiratory Syncytial Virus                                                                  | 2011                       | NCT00658086 |
| 9          | Nguyen, Quan Dong           | Dose-Ranging Evaluation of Intravitreal siRNA PF-04523655 for Diabetic Macular Edema (the DEGAS Study)                                                          | 2012                       | NCT00701181 |
| 10         | Nguyen, Quan Dong           | Evaluation of the siRNA PF-04523655 versus Ranibizumab for the Treatment of Neovascular Age-related Macular Degeneration (MONET Study)                          | 2012                       | NCT00713518 |
| 11         | Nguyen, Quan Dong           | Phase 1 dose-escalation study of a siRNA targeting the RTP801 gene in age-related macular degeneration patients                                                 | 2012                       | NCT00725686 |
| 12         | Senzer, Neil                | Phase I Trial of "bi-shRNAi(furin)/GMCSF DNA/Autologous Tumor Cell" Vaccine (FANG) in Advanced Cancer                                                           | 2012                       | -           |

|    |                         |                                                                                                                                                                                                                                                  |      |              |
|----|-------------------------|--------------------------------------------------------------------------------------------------------------------------------------------------------------------------------------------------------------------------------------------------|------|--------------|
| 13 | Coelho, Teresa          | Safety and Efficacy of RNAi Therapy for Transthyretin Amyloidosis                                                                                                                                                                                | 2013 | NCT01148953  |
| 14 | Coelho, Teresa          | Safety and Efficacy of RNAi Therapy for Transthyretin Amyloidosis                                                                                                                                                                                | 2013 | NCT01559077  |
| 15 | Taberner, Josep         | First-in-Humans Trial of an RNA Interference Therapeutic Targeting VEGF and KSP in Cancer Patients with Liver Involvement                                                                                                                        | 2013 | NCT00882180  |
| 16 | Taberner, Josep         | First-in-Humans Trial of an RNA Interference Therapeutic Targeting VEGF and KSP in Cancer Patients with Liver Involvement                                                                                                                        | 2013 | NCT01158079  |
| 17 | Fitzgerald, Kevin       | Effect of an RNA interference drug on the synthesis of proprotein convertase subtilisin/kexin type 9 (PCSK9) and the concentration of serum LDL cholesterol in healthy volunteers: a randomised, single-blind, placebo-controlled, phase 1 trial | 2014 | NCT01437059  |
| 18 | Moreno-Montanes, Javier | Phase I Clinical Trial of SYL040012, a Small Interfering RNA Targeting beta-Adrenergic Receptor 2, for Lowering Intraocular Pressure                                                                                                             | 2014 | NCT00990743  |
| 19 | Nemunaitis, John        | Summary of bi-shRNA(furin)/GM-CSF Augmented Autologous Tumor Cell Immunotherapy (FANG (TM)) in Advanced Cancer of the Liver                                                                                                                      | 2014 | -            |
| 20 | Schultheis, Beate       | First-in-Human Phase I Study of the Liposomal RNA Interference Therapeutic Atu027 in Patients With Advanced Solid Tumors                                                                                                                         | 2014 | NCT00938574  |
| 21 | Zuckerman, Jonathan E.  | Correlating animal and human phase Ia/Ib clinical data with CALAA-01, a targeted, polymer-based nanoparticle containing siRNA                                                                                                                    | 2014 | NCT00689065* |
| 22 | Barve, Minal            | Phase 1 Trial of Bi-shRNA STMN1 BIV in Refractory Cancer                                                                                                                                                                                         | 2015 | NCT01505153* |
| 23 | Golan, Talia            | RNAi therapy targeting KRAS in combination with chemotherapy for locally advanced pancreatic cancer patients                                                                                                                                     | 2015 | NCT01188785  |
| 24 | Suhr, Ole B.            | Efficacy and safety of patisiran for familial amyloidotic polyneuropathy: a phase II multi-dose study                                                                                                                                            | 2015 | NCT01617967  |
| 25 | Gottlieb, Jens          | ALN-RSV01 for prevention of bronchiolitis obliterans syndrome after respiratory syncytial virus. infection in lung transplant recipients                                                                                                         | 2016 | NCT01065935  |

|    |                      |                                                                                                                                                                                        |      |              |
|----|----------------------|----------------------------------------------------------------------------------------------------------------------------------------------------------------------------------------|------|--------------|
| 26 | Oh, Jonathan         | Phase II study of Vigil DNA engineered immunotherapy as maintenance in advanced stage ovarian cancer                                                                                   | 2016 | -            |
| 27 | Dunning, Jake        | Experimental Treatment of Ebola Virus Disease with TKM-130803: A Single-Arm Phase 2 Clinical Trial                                                                                     | 2016 | -            |
| 28 | Adams, David         | Trial design and rationale for APOLLO, a Phase 3, placebo-controlled study of patisiran in patients with hereditary ATTR amyloidosis with polyneuropathy                               | 2017 | NCT01960348  |
| 29 | Beg, Muhammad S.     | Phase I study of MRX34, a liposomal miR-34a mimic, administered twice weekly in patients with advanced solid tumors                                                                    | 2017 | NCT01829971  |
| 30 | Fitzgerald, Kevin    | A Highly Durable RNAi Therapeutic Inhibitor of PCSK9                                                                                                                                   | 2017 | NCT02314442  |
| 31 | Pasi, K. John        | Targeting of Antithrombin in Hemophilia A or B with RNAi Therapy                                                                                                                       | 2017 | NCT02035605  |
| 32 | Ray, Kausik K.       | Inclisiran in Patients at High Cardiovascular Risk with Elevated LDL Cholesterol                                                                                                       | 2017 | NCT02597127  |
| 33 | Schlupe, Thomas      | Safety, Tolerability, and Pharmacokinetics of ARC-520 Injection, an RNA Interference-Based Therapeutic for the Treatment of Chronic Hepatitis B Virus Infection, in Healthy Volunteers | 2017 | NCT01872065  |
| 34 | Suzuki, Kenji        | Phase 1 Clinical Study of siRNA Targeting Carbohydrate Sulphotransferase 15 in Crohn's Disease Patients with Active Mucosal Lesions                                                    | 2017 | -            |
| 35 | van Zandwijk, Nico   | Safety and activity of microRNA-loaded minicells in patients with recurrent malignant pleural mesothelioma: a first-in-man, phase 1, open-label, dose-escalation study                 | 2017 | NCT02369198  |
| 36 | Wooddell, Christine  | RNAi-based treatment of chronically infected patients and chimpanzees reveals that integrated hepatitis B virus DNA is a source of HBsAg                                               | 2017 | NCT02065336* |
| 37 | Zimmermann, Tracy S. | Clinical Proof of Concept for a Novel Hepatocyte-Targeting GalNAc-siRNA Conjugate                                                                                                      | 2017 | NCT01814839  |
| 38 | Turner, Alice M.     | Hepatic-targeted RNA interference provides robust and persistent knockdown of alpha-1 antitrypsin levels in ZZ patients                                                                | 2018 | NCT02363946  |
| 39 | Wang, Danhong        | Efficacy of intracellular immune checkpoint-silenced DC vaccine                                                                                                                        | 2018 | NCT01956630  |

|    |                    |                                                                                                                                                                                                                                                      |      |              |
|----|--------------------|------------------------------------------------------------------------------------------------------------------------------------------------------------------------------------------------------------------------------------------------------|------|--------------|
| 40 | El Dika, Imane     | An Open-Label, Multicenter, Phase I, Dose Escalation Study with Phase II Expansion Cohort to Determine the Safety, Pharmacokinetics, and Preliminary Antitumor Activity of Intravenous TKM-080301 in Subjects with Advanced Hepatocellular Carcinoma | 2019 | NCT02191878  |
| 41 | Kavita, Uma        | A Fit-for-Purpose Method for the Detection of Human Antibodies to Surface-Exposed Components of BMS-986263, a Lipid Nanoparticle-Based Drug Product Containing a siRNA Drug Substance                                                                | 2019 | -            |
| 42 | Sardh, Eliane      | Phase 1 Trial of an RNA Interference Therapy for Acute Intermittent Porphyria                                                                                                                                                                        | 2019 | NCT02452372  |
| 43 | Delville, Marianne | Safety of CD34+ Hematopoietic Stem Cells and CD4+ T Lymphocytes Transduced with LVsh5/C46 in HIV-1 Infected Patients with High-Risk Lymphoma                                                                                                         | 2019 | NCT03593187* |
| 44 | Brandts, Julia     | Clinical implications and outcomes of the ORION Phase III trials                                                                                                                                                                                     | 2020 | NCT02963311  |
| 45 | Brandts, Julia     | Clinical implications and outcomes of the ORION Phase III trials                                                                                                                                                                                     | 2020 | NCT03060577  |
| 46 | Brandts, Julia     | Clinical implications and outcomes of the ORION Phase III trials                                                                                                                                                                                     | 2020 | NCT03851705  |
| 47 | Brandts, Julia     | Clinical implications and outcomes of the ORION Phase III trials                                                                                                                                                                                     | 2020 | NCT03060577  |
| 48 | Coelho, Teresa     | A phase II, open-label, extension study of long-term patisiran treatment in patients with hereditary transthyretin-mediated (hATTR) amyloidosis                                                                                                      | 2020 | NCT01961921  |
| 49 | Ray, Kausik K.     | Two Phase 3 Trials of Inclisiran in Patients with Elevated LDL Cholesterol                                                                                                                                                                           | 2020 | NCT03399370  |
| 50 | Ray, Kausik K.     | Two Phase 3 Trials of Inclisiran in Patients with Elevated LDL Cholesterol                                                                                                                                                                           | 2020 | NCT03400800  |
| 51 | Balwani, Manisha   | Phase 3 Trial of RNAi Therapeutic Givosiran for Acute Intermittent Porphyria                                                                                                                                                                         | 2020 | NCT03338816  |
| 52 | Raal, Frederick J. | Inclisiran for the Treatment of Heterozygous Familial Hypercholesterolemia                                                                                                                                                                           | 2020 | NCT03397121  |
| 53 | Judge, Daniel P.   | Phase 3 Multicenter Study of Revusiran in Patients with Hereditary Transthyretin-Mediated (hATTR) Amyloidosis with Cardiomyopathy (ENDEAVOUR)                                                                                                        | 2020 | NCT02319005  |



|    |                       |                                                                                                                                                                                                                        |      |             |
|----|-----------------------|------------------------------------------------------------------------------------------------------------------------------------------------------------------------------------------------------------------------|------|-------------|
| 54 | Wright, R. Scott      | Effects of Renal Impairment on the Pharmacokinetics, Efficacy, and Safety of Inclisiran: An Analysis of the ORION-7 and ORION-1 Studies                                                                                | 2020 | NCT03159416 |
| 55 | Yuen, Man-Fung        | RNA Interference Therapy With ARC-520 Results in Prolonged Hepatitis B Surface Antigen Response in Patients With Chronic Hepatitis B Infection                                                                         | 2020 | NCT02604199 |
| 56 | Yuen, Man-Fung        | RNA Interference Therapy With ARC-520 Results in Prolonged Hepatitis B Surface Antigen Response in Patients With Chronic Hepatitis B Infection                                                                         | 2020 | NCT02604212 |
| 57 | Chen, Li-Yun          | Successful application of anti-CD19 CAR-T therapy with IL-6 knocking down to patients with central nervous system B-cell acute lymphocytic leukemia                                                                    | 2020 | NCT03064269 |
| 58 | Schultheis, Beate     | Safety, efficacy and pharmacokinetics of targeted therapy with the liposomal RNA interference therapeutic atu027 combined with gemcitabine in patients with pancreatic adenocarcinoma. A randomized phase Ib/IIa study | 2020 | NCT01808638 |
| 59 | Garrelfs, Sander F.   | Lumasiran, an RNAi Therapeutic for Primary Hyperoxaluria Type 1                                                                                                                                                        | 2021 | NCT03681184 |
| 60 | Esrick, Erica B.      | Post-Transcriptional Genetic Silencing of BCL11A to Treat Sickle Cell Disease                                                                                                                                          | 2021 | NCT03282656 |
| 61 | Badri, Prajakta       | Pharmacokinetic and Pharmacodynamic Properties of Cemdisiran, an RNAi Therapeutic Targeting Complement Component 5, in Healthy Subjects and Patients with Paroxysmal Nocturnal Hemoglobinuria                          | 2021 | NCT02352493 |
| 62 | Gupta, Sheha V. Gupta | Clinical and Preclinical Single-Dose Pharmacokinetics of VIR-2218, an RNAi Therapeutic Targeting HBV Infection                                                                                                         | 2021 | NCT03672188 |
| 63 | Kumthekar, Priya      | A first-in-human phase 0 clinical study of RNA interference-based spherical nucleic acids in patients with recurrent glioblastoma                                                                                      | 2021 | NCT03020017 |
| 64 | Adams, David          | Long-term safety and efficacy of patisiran for hereditary transthyretin-mediated amyloidosis with polyneuropathy: 12-month results of an open-label extension study                                                    | 2021 | NCT02510261 |

|    |                     |                                                                                                                                                                                                                                          |      |             |
|----|---------------------|------------------------------------------------------------------------------------------------------------------------------------------------------------------------------------------------------------------------------------------|------|-------------|
| 65 | Frishberg, Yaacov   | Phase 1/2 Study of Lumasiran for Treatment of Primary Hyperoxaluria Type 1 A Placebo-Controlled Randomized Clinical Trial                                                                                                                | 2021 | NCT02706886 |
| 66 | Thielmann, Matthias | Teprasiran, a Small Interfering RNA, for the Prevention of Acute Kidney Injury in High-Risk Patients Undergoing Cardiac Surgery A Randomized Clinical Study                                                                              | 2021 | NCT02610283 |
| 67 | Vassiliou, Daphne   | A Drug-Drug Interaction Study Evaluating the Effect of Givosiran, a Small Interfering Ribonucleic Acid, on Cytochrome P450 Activity in the Liver                                                                                         | 2021 | NCT03505853 |
| 68 | To-Figueras, Jordi  | Dysregulation of homocysteine homeostasis in acute intermittent porphyria patients receiving heme arginate or givosiran                                                                                                                  | 2021 | -           |
| 69 | Gane, Ed            | JNJ-73763989 pharmacokinetics and safety: Liver-targeted siRNAs against hepatitis B virus, in Japanese and non-Japanese healthy adults, and combined with JNJ-56136379 and a nucleos(t)ide analogue in patients with chronic hepatitis B | 2022 | NCT03365947 |
| 70 | Gane, Ed            | JNJ-73763989 pharmacokinetics and safety: Liver-targeted siRNAs against hepatitis B virus, in Japanese and non-Japanese healthy adults, and combined with JNJ-56136379 and a nucleos(t)ide analogue in patients with chronic hepatitis B | 2022 | NCT04002752 |
| 71 | Gong, Wen-Jie       | Investigation of the risk factors to predict cytokine release syndrome in relapsed or refractory B-cell acute lymphoblastic leukemia patients receiving IL-6 knocking down anti-CD19 chimeric antigen receptor T-cell therapy            | 2022 | NCT03275493 |
| 72 | Hoppe, Bernd        | Safety, pharmacodynamics, and exposure-response modeling results from a first-in-human phase 1 study of nedosiran (PHYOX1) in primary hyperoxaluria                                                                                      | 2022 | NCT03392896 |
| 73 | Kallend, David      | An evaluation of a suprathreshold dose of inclisiran on cardiac repolarization in healthy volunteers: A phase I, randomized study                                                                                                        | 2022 | -           |
| 74 | Koren, Michael J.   | Preclinical development and phase 1 trial of a novel siRNA targeting lipoprotein(a)                                                                                                                                                      | 2022 | NCT03626662 |
| 75 | Lawitz, Eric J.     | BMS-986263 in patients with advanced hepatic fibrosis: 36-week results from a randomized, placebo-controlled phase 2 trial                                                                                                               | 2022 | NCT03420768 |

|    |                      |                                                                                                                                                                                  |      |             |
|----|----------------------|----------------------------------------------------------------------------------------------------------------------------------------------------------------------------------|------|-------------|
| 76 | Nissen, Steven E.    | Single Ascending Dose Study of a Short Interfering RNA Targeting Lipoprotein(a) Production in Individuals With Elevated Plasma Lipoprotein(a) Levels                             | 2022 | NCT04606602 |
| 77 | Rejman, M. Doortje   | Rationale and design of two trials assessing the efficacy, safety, and tolerability of inclisiran in adolescents with homozygous and heterozygous familial hypercholesterolaemia | 2022 | NCT04659863 |
| 78 | Rejman, M. Doortje   | Rationale and design of two trials assessing the efficacy, safety, and tolerability of inclisiran in adolescents with homozygous and heterozygous familial hypercholesterolaemia | 2022 | NCT04652726 |
| 79 | Rocconi, Rodney P.   | Proof of principle study of sequential combination atezolizumab and Vigil in relapsed ovarian cancer                                                                             | 2022 | NCT03073525 |
| 80 | Sohn, Winnie         | Pharmacokinetics, Pharmacodynamics, and Tolerability of Olpasiran in Healthy Japanese and Non-Japanese Participants: Results from a Phase I, Single-dose, Open-label Study       | 2022 | -           |
| 81 | Strnad, Pavel        | Fazirsiran for Liver Disease Associated with Alpha(1)-Antitrypsin Deficiency                                                                                                     | 2022 | NCT03946449 |
| 82 | Sas, David J.        | Phase 3 trial of lumasiran for primary hyperoxaluria type 1: A new RNAi therapeutic in infants and young children                                                                | 2022 | NCT03905694 |
| 83 | Adams, David         | Efficacy and safety of vutrisiran for patients with hereditary transthyretin-mediated amyloidosis with polyneuropathy: a randomized clinical trial                               | 2022 | NCT03759379 |
| 84 | Kallend, David       | Pharmacokinetics and pharmacodynamics of inclisiran, a small interfering RNA therapy, in patients with hepatic impairment                                                        | 2022 | -           |
| 85 | O'Donoghue, Michelle | Small Interfering RNA to Reduce Lipoprotein(a) in Cardiovascular Disease                                                                                                         | 2022 | NCT04270760 |
| 86 | Schmidt, Hartmu H.   | Patisiran treatment in patients with hereditary transthyretin-mediated amyloidosis with polyneuropathy after liver transplantation                                               | 2022 | NCT03862807 |
| 87 | Ventura, Paolo       | Efficacy and safety of givosiran for acute hepatic porphyria: 24-month interim analysis of the randomized phase 3 ENVISION study                                                 | 2022 | NCT03338816 |
| 88 | Li, Haiyan           | Pharmacokinetics, Safety, and Tolerability of the siRNA JNJ-73763989 in Healthy Chinese Adult Participants                                                                       | 2023 | NCT04586439 |

|           |               |                                                                                                                    |      |             |
|-----------|---------------|--------------------------------------------------------------------------------------------------------------------|------|-------------|
| <b>89</b> | Mak, Lung-Yi  | A phase I/II study of ARO-HSD, an RNA interference therapeutic, for the treatment of non-alcoholic steatohepatitis | 2023 | NCT04202354 |
| <b>90</b> | Michael, Mini | Lumasiran for Advanced Primary Hyperoxaluria Type 1: Phase 3 ILLUMINATE-C Trial                                    | 2023 | NCT04152200 |

**Table S2: Overview of the included ongoing clinical trials.** Characteristics of the 48 ongoing clinical trials included in this review.

| <b>Nr.</b> | <b>Sponsor</b>               | <b>Title</b>                                                                                                                   | <b>Year of clinical start date</b> | <b>NCT</b>  |
|------------|------------------------------|--------------------------------------------------------------------------------------------------------------------------------|------------------------------------|-------------|
| 1          | Genzyme, a Sanofi Company    | An Open-label Extension Study of an Investigational Drug, Fitusiran, in Patients with Moderate or Severe Hemophilia A or B     | 2015                               | NCT02554773 |
| 2          | M.D. Anderson Cancer Center  | EphA2 siRNA in Treating Patients With Advanced or Recurrent Solid Tumors                                                       | 2015                               | NCT01591356 |
| 3          | AIDS Malignancy Consortium   | Gene Therapy in Treating Patients With Human Immunodeficiency Virus-Related Lymphoma Receiving Stem Cell Transplant            | 2016                               | NCT02797470 |
| 4          | Gradalis, Inc.               | Pbi-shRNA™ EWS/FLI1 Type 1 LPX in Subjects With Advanced Ewing's Sarcoma                                                       | 2016                               | NCT02736565 |
| 5          | Gradalis, Inc.               | Trial of Atezolizumab and Vigil for Advanced Gynecological Cancers (A Companion Study to CL-PTL-119)                           | 2017                               | NCT03073525 |
| 6          | University of Oxford         | A Randomized Trial Assessing the Effects of Inclisiran on Clinical Outcomes Among People With Cardiovascular Disease (ORION-4) | 2018                               | NCT03705234 |
| 7          | Alnylam Pharmaceuticals      | A Study to Evaluate Lumasiran in Children and Adults With Primary Hyperoxaluria Type 1 (ILLUMINATE-A)                          | 2018                               | NCT03681184 |
| 8          | Gradalis, Inc                | Vigil + Irinotecan and Temozolomide in Ewing's Sarcoma (VITA)                                                                  | 2018                               | NCT03495921 |
| 9          | Alnylam Pharmaceuticals      | An Extension Study of an Investigational Drug, Lumasiran (ALN-GO1), in Patients With Primary Hyperoxaluria Type 1              | 2018                               | NCT03350451 |
| 10         | Boston Children's University | Gene Transfer for Sickle Cell Disease                                                                                          | 2018                               | NCT03282656 |
| 11         | Silenseed Ltd                | A Phase 2 Study of siG12D LODER in Combination With Chemotherapy in Patients With Locally Advanced Pancreatic Cancer (PROTACT) | 2018                               | NCT01676259 |
| 12         | Alnylam Pharmaceuticals      | HELIOS-B: A Study to Evaluate Vutrisiran in Patients With Transthyretin Amyloidosis With Cardiomyopathy                        | 2019                               | NCT04153149 |

|           |                               |                                                                                                                                                               |      |             |
|-----------|-------------------------------|---------------------------------------------------------------------------------------------------------------------------------------------------------------|------|-------------|
| <b>13</b> | Dicerna Pharmaceuticals, Inc. | Long Term Extension Study in Patients With Primary Hyperoxaluria (PHYOX3)                                                                                     | 2019 | NCT04042402 |
| <b>14</b> | Hugel                         | The Hypertrophic Scar Prevention of BMT101                                                                                                                    | 2019 | NCT04012099 |
| <b>15</b> | Alnylam Pharmaceuticals       | APOLLO-B: A Study to Evaluate Patisiran in Participants With Transthyretin Amyloidosis With Cardiomyopathy (ATTR Amyloidosis With Cardiomyopathy)             | 2019 | NCT03997383 |
| <b>16</b> | Alnylam Pharmaceuticals       | A Study of Lumasiran in Infants and Young Children With Primary Hyperoxaluria Type 1 (ILLUMINATE-B)                                                           | 2019 | NCT03905694 |
| <b>17</b> | Nitto BioPharma, Inc.         | A Study of NBF-006 in Non-Small Cell Lung, Pancreatic, or Colorectal Cancer                                                                                   | 2019 | NCT03819387 |
| <b>18</b> | Novartis Pharmaceuticals      | Trial to Assess the Effect of Long-Term Dosing of Inclisiran in Subjects With High CV Risk and Elevated LDL-C (ORION-8)                                       | 2019 | NCT03814187 |
| <b>19</b> | Sirnaomics                    | A Study of STP707 Administered by IV in Healthy Subjects                                                                                                      | 2020 | NCT05309915 |
| <b>20</b> | InterNA                       | First-in-Human Study of INT-1B3 in Patients With Advanced Solid Tumors                                                                                        | 2020 | NCT04675996 |
| <b>21</b> | Alnylam Pharmaceuticals       | A Study of ALN-HSD in Healthy Adult Subjects and Adult Patients With Nonalcoholic Steatohepatitis (NASH)                                                      | 2020 | NCT04565717 |
| <b>22</b> | Hoffmann-La Roche             | A Trial To Evaluate The Efficacy And Safety Of Multiple Combination Therapies In Participants With Chronic Hepatitis B (Piranga)                              | 2020 | NCT04225715 |
| <b>23</b> | Alnylam Pharmaceuticals       | A Study to Evaluate Lumasiran in Patients With Advanced Primary Hyperoxaluria Type 1 (ILLUMINATE-C)                                                           | 2020 | NCT04152200 |
| <b>24</b> | 4D Molecular Therapeutics     | 4D-150 in Patients With Neovascular (Wet) Age-Related Macular Degeneration                                                                                    | 2021 | NCT05197270 |
| <b>25</b> | Alnylam Pharmaceuticals       | Zilebesiran as Add-on Therapy in Patients With Hypertension Not Adequately Controlled by a Standard of Care Antihypertensive Medication (KARDIA-2) (KARDIA-2) | 2021 | NCT05103332 |
| <b>26</b> | Novartis Pharmaceuticals      | Study of Inclisiran to Prevent Cardiovascular (CV) Events in Participants With Established Cardiovascular Disease (VICTORION-2P)                              | 2021 | NCT05030428 |

|    |                             |                                                                                                                                                                                                  |      |             |
|----|-----------------------------|--------------------------------------------------------------------------------------------------------------------------------------------------------------------------------------------------|------|-------------|
| 27 | Alnylam Pharmaceuticals     | A Study to Evaluate Efficacy and Safety of ALN-AGT01 in Patients With Mild To-Moderate Hypertension (KARDIA-1) (KARDIA-1)                                                                        | 2021 | NCT04936035 |
| 28 | Olix Pharmaceuticals, Inc.  | Study to Evaluate Efficacy of OLX10010 in Reducing Recurrence of Hypertrophic Scarring After Scar Revision Surgery                                                                               | 2021 | NCT04877756 |
| 29 | Sirnaomics                  | A Study to Evaluate Safety, Efficacy of Intralesional Injection of STP705 in Patients With isSCC                                                                                                 | 2021 | NCT04844983 |
| 30 | Sirnaomics                  | A Study for Safety and Efficacy Evaluation of Various Doses of STP705 in Reducing Keloid Recurrence                                                                                              | 2021 | NCT04844840 |
| 31 | Assembly Biosciences        | A Study Evaluating Treatment Regimens Containing Vebicorvir (ABI-H0731) in Participants With Chronic Hepatitis B Infection                                                                       | 2021 | NCT04820686 |
| 32 | Sylentis, S.A.              | Tivanisiran for Dry Eye in Subjects With Sjögren's Syndrome                                                                                                                                      | 2021 | NCT04819269 |
| 33 | Novartis Pharmaceuticals    | Study of Efficacy and Safety of Inclisiran in Asian Participants With Atherosclerotic Cardiovascular Disease (ASCVD) or ASCVD High Risk and Elevated Low Density Lipoprotein Cholesterol (LDL-C) | 2021 | NCT04765657 |
| 34 | Novartis Pharmaceuticals    | Study to Evaluate Efficacy and Safety of Inclisiran in Adolescents With Homozygous Familial Hypercholesterolemia (ORION-13)                                                                      | 2021 | NCT04659863 |
| 35 | Novartis Pharmaceuticals    | Study to Evaluate Efficacy and Safety of Inclisiran in Adolescents With Heterozygous Familial Hypercholesterolemia (ORION-16)                                                                    | 2021 | NCT04652726 |
| 36 | M.D. Anderson Cancer Center | iExosomes in Treating Participants With Metastatic Pancreas Cancer With KrasG12D Mutation                                                                                                        | 2021 | NCT03608631 |
| 37 | Oneness Biotech Co., Ltd.   | A Phase I Study to Evaluate the Safety, Tolerability, and Pharmacokinetics of Single and Multiple Ascending Doses of Inhaled MBS-COV (SNS812) in Healthy Participants                            | 2022 | NCT05677893 |
| 38 | Sylentis, S.A.              | A Randomized, Double Masked, Parallel Group, Dose-finding Study to Evaluate SYL1801 in Patients With Neovascular Age-related Macular Degeneration (AMD)                                          | 2022 | NCT05637255 |
| 39 | Vir Biotechnology, Inc.     | Effect of Hepatic Impairment on the Pharmacokinetics and Safety of VIR-2218 and VIR-3434                                                                                                         | 2022 | NCT05484206 |

|    |                              |                                                                                                                            |      |             |
|----|------------------------------|----------------------------------------------------------------------------------------------------------------------------|------|-------------|
| 40 | Sirnaomics                   | A Study to Evaluate Safety, Tolerability of Subcutaneous Injection in Adult Subjects Undergoing Abdominoplasty             | 2022 | NCT05422378 |
| 41 | Boston Children's University | A Gene Transfer Study Inducing Fetal Hemoglobin in Sickle Cell Disease (GRASP, BMT CTN 2001) (GRASP)                       | 2022 | NCT05353647 |
| 42 | Sylentis, S.A.               | Safety Study of Tivanisiran to Treat Dry Eye (FYDES)                                                                       | 2022 | NCT05310422 |
| 43 | Alnylam Pharmaceuticals      | A Study to Evaluate ALN-XDH in Healthy Subjects and Patients With Gout                                                     | 2022 | NCT05256810 |
| 44 | City of Hope Medical Center  | CpG-STAT3 siRNA CAS3/SS3 and Localized Radiation Therapy for the Treatment of Relapsed/Refractory B-Cell NHL               | 2022 | NCT04995536 |
| 45 | Lemonex Inc.                 | A Study of Single Ascending Dose of LEM-S401 in Healthy Participants                                                       | 2022 | NCT04707131 |
| 46 | Olix Pharmaceuticals, Inc.   | Evaluation of OLX10212 in Patients With Neovascular Age-related Macular Degeneration                                       | 2023 | NCT05643118 |
| 47 | Silence Therapeutics plc     | Evaluate SLN360 in Participants With Elevated Lipoprotein(a) at High Risk of Atherosclerotic Cardiovascular Disease Events | 2023 | NCT05537571 |
| 48 | Silence Therapeutics plc     | Study to Assess SLN124 in Patients With Polycythemia Vera (SLN)                                                            | 2023 | NCT05499013 |



**Table S3: Studies presenting with two or more clinical trials with individual NCT number.** Overview of the included studies presenting with two or more individual NCT numbers.

| <b>Title</b>                                                                                                                                                                                                                             | <b>Name of first author</b> | <b>Year of publication</b> | <b>Number of different NCT number</b> | <b>The different NCT numbers</b> |
|------------------------------------------------------------------------------------------------------------------------------------------------------------------------------------------------------------------------------------------|-----------------------------|----------------------------|---------------------------------------|----------------------------------|
| Safety and Efficacy of RNAi Therapy for Transthyretin Amyloidosis                                                                                                                                                                        | Coelho, Teresa              | 2013                       | 2                                     | NCT01148953                      |
|                                                                                                                                                                                                                                          |                             |                            |                                       | NCT01559077                      |
| First-in-Humans Trial of an RNA Interference Therapeutic Targeting VEGF and KSP in Cancer Patients with Liver Involvement                                                                                                                | Tabernero, Josep            | 2013                       | 2                                     | NCT00882180                      |
|                                                                                                                                                                                                                                          |                             |                            |                                       | NCT01158079                      |
| Clinical implications and outcomes of the ORION Phase III trials                                                                                                                                                                         | Brandts, Julia              | 2020                       | 4                                     | NCT02963311                      |
|                                                                                                                                                                                                                                          |                             |                            |                                       | NCT03060577                      |
|                                                                                                                                                                                                                                          |                             |                            |                                       | NCT03851705                      |
|                                                                                                                                                                                                                                          |                             |                            |                                       | NCT03060577                      |
| Two Phase 3 Trials of Inclisiran in Patients with Elevated LDL Cholesterol                                                                                                                                                               | Ray, Kausik K.              | 2020                       | 2                                     | NCT03399370                      |
|                                                                                                                                                                                                                                          |                             |                            |                                       | NCT03400800                      |
| RNA Interference Therapy With ARC-520 Results in Prolonged Hepatitis B Surface Antigen Response in Patients With Chronic Hepatitis B Infection                                                                                           | Yuen, Man-Fung              | 2020                       | 2                                     | NCT02604199                      |
|                                                                                                                                                                                                                                          |                             |                            |                                       | NCT02604212                      |
| JNJ-73763989 pharmacokinetics and safety: Liver-targeted siRNAs against hepatitis B virus, in Japanese and non-Japanese healthy adults, and combined with JNJ-56136379 and a nucleos(t)ide analogue in patients with chronic hepatitis B | Gane, Ed                    | 2022                       | 2                                     | NCT03365947                      |
|                                                                                                                                                                                                                                          |                             |                            |                                       | NCT04002752                      |
| Rationale and design of two trials assessing the efficacy, safety, and tolerability of inclisiran in adolescents with homozygous and heterozygous familial hypercholesterolaemia                                                         | Reijman, M. Doortje         | 2022                       | 2                                     | NCT04659863                      |
|                                                                                                                                                                                                                                          |                             |                            |                                       | NCT04652726                      |

**Table S4: Types of *ex vivo* delivery.** Table summarizing the different types of *ex vivo* administration in the published/ongoing trials, shown in Fig. 4A. “Number” indicates the total number of studies utilizing the type of *ex vivo* administration.

| Published clinical trials                                            |        | Ongoing clinical trials                |        |
|----------------------------------------------------------------------|--------|----------------------------------------|--------|
| Type                                                                 | Number | Type                                   | Number |
| DNA transfection of tumor cells                                      | 4      | CD34+ cells transduced with lentivirus | 3      |
| T lymphocytes or hematopoietic stem cells transduced with lentivirus | 3      | DNA transfection of tumor cells        | 2      |
| CAR-T cells transduced with lentivirus                               | 1      | Adenovirus transduction                | 1      |
| Adenovirus transduction                                              | 2      |                                        |        |
| Minicells                                                            | 1      |                                        |        |

**Table S5: Disease etiology.** Diseases treated with RNAi therapeutics grouped by disease etiology. Information regarding the name of the RNAi-based drug, the number of times the RNAi therapeutic has been used in published/ongoing clinical trials, and total number of diseases treated with the RNAi therapeutics in published/ongoing clinical trials. The color of the border of the organ-boxes correlates with the color-coded annotations in Fig. 6. ASCVD, Atherosclerotic cardiovascular disease; hATTR, Hereditary ATTR amyloidosis; RSV, Respiratory Syncytial Virus; HBV, hepatitis B virus; HIV-1, Human Immunodeficiency Virus-1; wAMD, wet Age-dependent Macular Degeneration; DME, Diabetic Macular Edema; IOP, Intraocular Pressure.

| Organ                 | Disease                                                                     | Name of RNAi-based drug and number included in published/ongoing clinical trials | Total number of diseases treated in published/ongoing clinical trials |
|-----------------------|-----------------------------------------------------------------------------|----------------------------------------------------------------------------------|-----------------------------------------------------------------------|
| <b>Cardiovascular</b> |                                                                             |                                                                                  | <b>19/9</b>                                                           |
|                       | ASCVD                                                                       | Inclisiran                                                                       | 15/6                                                                  |
|                       | Elevated Apolipoprotein A (cardiovascular disease) and hypercholesterolemia | Olpasiran: 3/0                                                                   | 4/1                                                                   |
|                       |                                                                             | SLN360: 1/1                                                                      |                                                                       |
|                       | Hypertension                                                                | ALALN-AGT01                                                                      | 0/2                                                                   |
| <b>Tumor</b>          |                                                                             |                                                                                  | <b>19/11</b>                                                          |
|                       | Cancer with CNS involvement                                                 | ATN-RNA:1                                                                        | 2/0                                                                   |
|                       |                                                                             | NU-0129: 1                                                                       |                                                                       |
|                       | Advanced cancer                                                             | FANG/VIGIL: 2/0                                                                  | 6/4                                                                   |
|                       |                                                                             | Atu27:1/0                                                                        |                                                                       |
|                       |                                                                             | CALAA-01: 1/0                                                                    |                                                                       |
|                       |                                                                             | STMN1: 1/0                                                                       |                                                                       |
|                       |                                                                             | MRX34: 1/0                                                                       |                                                                       |
|                       |                                                                             | EphA2 siRNA: 0/1                                                                 |                                                                       |
|                       |                                                                             | NBF-006: 0/1                                                                     |                                                                       |
|                       |                                                                             | INT-1B3: 0/1                                                                     |                                                                       |
|                       |                                                                             | ALN-HSD: 0/1                                                                     |                                                                       |
|                       | Cancer with liver involvement                                               | ALN-VSP: 2/0                                                                     | 3/0                                                                   |
|                       |                                                                             | TKM-080301: 1/0                                                                  |                                                                       |
|                       | Recurrent Malignant Pleural Mesothelioma                                    | TargomiR                                                                         | 1/0                                                                   |
|                       | Central nervous system B-cell acute lymphocytic leukemia                    | ssCART-19s                                                                       | 1/0                                                                   |
|                       | Cancer with pancreas involvement                                            | siG12D-LODER: 1/2                                                                | 2/2                                                                   |
|                       |                                                                             | ATU027: 1                                                                        |                                                                       |

|               |                                                            |                                                                                                                           |             |
|---------------|------------------------------------------------------------|---------------------------------------------------------------------------------------------------------------------------|-------------|
|               | Relapsed or Refractory B-cell acute lymphoblastic leukemia | ssCAR-T19                                                                                                                 | 1/0         |
|               | Acute leukemia                                             | Ad-siSSF-DC                                                                                                               | 1/0         |
|               | Recurrent B-Cell Non-Hodgkin Lymphoma                      | CAS3/SS3                                                                                                                  | 0/1         |
|               | Cancer with female reproductive organs involved            | FANG/VIGIL: 2/1                                                                                                           | 2/1         |
|               | Squamous Cell Carcinoma                                    | STP705                                                                                                                    | 0/1         |
|               | Ewings Sarcoma                                             | pbi-shRNA: 0/1<br>Vigil: 0/1                                                                                              | 0/2         |
| <b>Liver</b>  |                                                            |                                                                                                                           | <b>18/3</b> |
|               | hATTR                                                      | Patisiran: 6/1<br>ALN-TTR01: 1/0<br>Revusiran: 2/0<br>Vutrisiran: 1/1                                                     | 10/2        |
|               | Acute hepatic porphyrias                                   | Givosiran                                                                                                                 | 5/0         |
|               | Advanced hepatic fibrosis                                  | BMS-986263                                                                                                                | 2/1         |
|               | Non-alcoholic steatohepatitis                              | ARO-HSD                                                                                                                   | 1/0         |
| <b>Viral</b>  |                                                            |                                                                                                                           | <b>16/5</b> |
|               | RSV                                                        | ALN-RSV01                                                                                                                 | 4/0         |
|               | Chronic HBV                                                | ARC-520: 6/0<br>JNJ-73763989: 2/0<br>JNJ-73763989 and JNJ-56136379: 1/0<br>RO7445482: 0/1<br>AB-729: 0/1<br>VIR-2218: 0/1 | 9/3         |
|               | Ebola virus                                                | TKM-13080                                                                                                                 | 1/0         |
|               | HIV-1 infection                                            | LVsh5/C46: 1/0<br>HIV-shI-TAR-CCR5RZ: 1/0<br>CCR5 shRNA/TRIM5alpha/TAR decoy: 0/1                                         | 2/1         |
|               | Coronavirus                                                | MBS-COV                                                                                                                   | 0/1         |
| <b>Kidney</b> |                                                            |                                                                                                                           | <b>6/5</b>  |
|               | Primary Hyperoxaluria Type 1                               | Lumasiran: 4/4<br>Nedosiran: 1/0<br>DCR-PHXC: 0/1                                                                         | 5/5         |

|                               |                                                     |                                                                                     |            |
|-------------------------------|-----------------------------------------------------|-------------------------------------------------------------------------------------|------------|
|                               | Acute Kidney Injury                                 | Teprasiran                                                                          | 1/0        |
| <b>Eye</b>                    |                                                     |                                                                                     | <b>5/5</b> |
|                               | wAMD                                                | AGN-211745: 1/0<br>PF-04523655: 2/0<br>OLX10212: 0/1<br>SYL1801: 0/1<br>4D-150: 0/1 | 3/3        |
|                               | DME                                                 | PF-04523655                                                                         | 1/0        |
|                               | Elevated IOP associated to glaucoma                 | SYL040012                                                                           | 1/0        |
|                               | Dry Eye Disease                                     | Tivanisiran (SYL1001)                                                               | 0/2        |
| <b>Blood</b>                  |                                                     |                                                                                     | <b>3/4</b> |
|                               | Hemophilia A or B                                   | Nedosiran: 1/0<br>Fitusiran: 0/1                                                    | 1/1        |
|                               | Sickle cell disease                                 | BCH-BB694: 1/0<br>CD34+ HSC-BCL11a: 0/2                                             | 1/2        |
|                               | Paroxysmal nocturnal hemoglobinuria                 | Cemdisiran                                                                          | 1/0        |
|                               | Polycythemia Vera                                   | SLN124                                                                              | 0/1        |
| <b>Skin</b>                   |                                                     |                                                                                     | <b>1/4</b> |
|                               | Pachyonychia congenita                              | TD101                                                                               | 1/0        |
|                               | Keloid                                              | STP705                                                                              | 0/1        |
|                               | Scar prevention                                     | LEM-S401: 0/1<br>BMT101: 0/1<br>OLX10010: 0/1                                       | 0/3        |
| <b>Respiratory</b>            |                                                     |                                                                                     | <b>2/0</b> |
|                               | Alpha-1 antitrypsin deficiency                      | ARC-AAT                                                                             | 2/0        |
| <b>Gastrointestinal tract</b> |                                                     |                                                                                     | <b>1/0</b> |
|                               | Chrons Disease                                      | STNM01                                                                              | 1/0        |
| <b>Joint</b>                  |                                                     |                                                                                     | <b>0/1</b> |
|                               | Gout                                                | ALN-ZDH                                                                             | 0/1        |
| <b>Lipid-tissue</b>           |                                                     |                                                                                     | <b>0/1</b> |
|                               | Decrease inflammation to decrease abdominal obesity | STP705                                                                              | 0/1        |

**Table S6: Tissue-targets of RNAi therapeutic.** Diseases treated with RNAi therapeutics grouped by tissues targeted by the effector. Information regarding the name of the RNAi-based drug, the number of times the RNAi therapeutic has been used in published/ongoing clinical trials, and total number of diseases treated with RNAi therapeutic in published/ongoing clinical trials. The color of the boarder of the organ-boxes correlates with the color-coded annotations in Fig. 7 ASCVD, Atherosclerotic cardiovascular disease; hATTR, Hereditary ATTR amyloidosis; RSV, Respiratory Syncytial Virus; HBV, hepatitis B virus; HIV-1, Human Immunodeficiency Virus-1; wAMD, wet Age-dependent Macular Degeneration; DME, Diabetic Macular Edema; IOP, Intraocular Pressure.

| Organ                                                      | Disease                                                  | Name of drug and how many (published/ongoing) | Number in total (published/ongoing) |
|------------------------------------------------------------|----------------------------------------------------------|-----------------------------------------------|-------------------------------------|
| Tumor                                                      |                                                          |                                               | 19/11                               |
|                                                            | Cancer with CNS involvement                              | ATN-RNA: 1/0                                  | 2/0                                 |
|                                                            |                                                          | NU-0129: 1/0                                  |                                     |
|                                                            | Advanced cancer                                          | FANG/VIGIL: 2/0                               | 6/4                                 |
|                                                            |                                                          | Atu27: 1/0                                    |                                     |
|                                                            |                                                          | CALAA-01: 1/0                                 |                                     |
|                                                            |                                                          | STMN1: 1/0                                    |                                     |
|                                                            |                                                          | MRX34: 1/0                                    |                                     |
|                                                            |                                                          | EphA2 siRNA: 0/1                              |                                     |
|                                                            |                                                          | NBF-006: 0/1                                  |                                     |
|                                                            |                                                          | INT-1B3: 0/1                                  |                                     |
|                                                            | ALN-HSD: 0/1                                             |                                               |                                     |
|                                                            | Cancer with liver involvement                            | ALN-VSP: 2/0                                  | 3/0                                 |
|                                                            |                                                          | TKM-080301: 1/0                               |                                     |
|                                                            | Recurrent Malignant Pleural Mesothelioma                 | TargomiR                                      | 1/0                                 |
|                                                            | Central nervous system B-cell acute lymphocytic leukemia | ssCART-19s                                    | 1/0                                 |
| Cancer with pancreas involvement                           | siG12D-LODER: 1/2                                        | 2/2                                           |                                     |
|                                                            | ATU027: 1/0                                              |                                               |                                     |
| Relapsed or Refractory B-cell acute lymphoblastic leukemia | ssCAR-T19                                                | 1/0                                           |                                     |
| Acute leukemia                                             | Ad-siSSF-DC                                              | 1/0                                           |                                     |
| Recurrent B-Cell Non-Hodgkin Lymphoma                      | CAS3/SS3                                                 | 0/1                                           |                                     |

|              |                                                                         |                                                                       |              |
|--------------|-------------------------------------------------------------------------|-----------------------------------------------------------------------|--------------|
|              | Cancer with female reproductive organs involved                         | FANG/VIGIL: 2/1                                                       | 2/1          |
|              | Squamous Cell Carcinoma                                                 | STP705                                                                | 0/1          |
|              | Ewings Sarcoma                                                          | pbi-shRNA: 1/0<br>Vigil: 1/0                                          | 0/2          |
| <b>Liver</b> |                                                                         |                                                                       | <b>46/20</b> |
|              | hATTR                                                                   | Patisiran: 6/1<br>ALN-TTR01: 1/0<br>Revusiran: 2/0<br>Vutrisiran: 1/1 | 10/2         |
|              | Hemophilia A or B                                                       | Nedosiran: 1/0<br>Fitusiran: 0/1                                      | 1/1          |
|              | Alpha-1 antitrypsin deficiency (AATD)                                   | ARC-AAT                                                               | 2/0          |
|              | Acute hepatic porphyrias                                                | Givosiran                                                             | 5/0          |
|              | Atherosclerotic cardiovascular disease (ASCVD) and hypercholesterolemia | Inclisiran                                                            | 15/6         |
|              | Primary Hyperoxaluria Type 1                                            | Lumasiran: 4/4<br>Nedosiran: 1/0<br>Lumasiran: 4<br>DCR-PHXC: 0/1     | 5/5          |
|              | Paroxysmal nocturnal hemoglobinuria                                     | Cemdisiran                                                            | 1/0          |
|              | Elevated Apolipoprotein A (cardiovascular disease)                      | Olpasiran: 3/0<br>SLN360: 1/1                                         | 4/1          |
|              | Advanced hepatic fibrosis                                               | BMS-986263                                                            | 2/1          |
|              | Non-alcoholic steatohepatitis                                           | ARO-HSD                                                               | 1/0          |
|              | Polycythemia Vera                                                       | SLN124                                                                | 0/1          |
|              | Hypertension                                                            | ALN-AGT01                                                             | 0/2          |
|              | Gout                                                                    | ALN-ZDH                                                               | 0/1          |
| <b>Viral</b> |                                                                         |                                                                       | <b>16/5</b>  |
|              | RSV                                                                     | ALN-RSV01                                                             | 4/0          |
|              | Chronic HBV                                                             | ARC-520: 6/0<br>JNJ-73763989: 2/0                                     | 9/3          |

|                               |                                                     |                                      |            |
|-------------------------------|-----------------------------------------------------|--------------------------------------|------------|
|                               |                                                     | JNJ-73763989 and JNJ-56136379: 1/0   |            |
|                               |                                                     | RO7445482: 0/1                       |            |
|                               |                                                     | AB-729: 0/1                          |            |
|                               |                                                     | VIR-2218: 0/1                        |            |
|                               | Ebola virus                                         | TKM-13080                            | 1/0        |
|                               | HIV-1 infection                                     | LVsh5/C46: 1/0                       | 2/1        |
|                               |                                                     | HIV-shI-TAR-CCR5RZ: 1/0              |            |
|                               |                                                     | CCR5/shRNA/TRIM5alpha/TAR decoy: 0/1 |            |
|                               | Coronavirus                                         | MBS-COV                              | 0/1        |
| <b>Kidney</b>                 |                                                     |                                      | <b>1/0</b> |
|                               | Acute Kidney Injury                                 | Teprasiran                           | 1/0        |
| <b>Eye</b>                    |                                                     |                                      | <b>5/5</b> |
|                               | Wet Age-dependent Macular Degeneration (wAMD)       | AGN-211745: 1/0                      | 3/3        |
|                               |                                                     | PF-04523655: 2/0                     |            |
|                               |                                                     | OLX10212: 0/1                        |            |
|                               |                                                     | SYL1801: 0/1                         |            |
|                               |                                                     | 4D-150: 0/1                          |            |
|                               | Diabetic Macular Edema (DME)                        | PF-04523655                          | 1/0        |
|                               | Elevated IOP associated to glaucoma                 | SYL040012                            | 1/0        |
|                               | Dry Eye Disease                                     | Tivanisiran (SYL1001)                | 0/2        |
| <b>Blood</b>                  |                                                     |                                      | <b>1/2</b> |
|                               | Sickle cell disease                                 | BCH-BB694: 1/0                       | 1/2        |
|                               |                                                     | CD34+ HSC-BCL11a: 0/2                |            |
| <b>Skin</b>                   |                                                     |                                      | <b>1/4</b> |
|                               | Pachyonychia congenita (PC)                         | TD101                                | 1/0        |
|                               | Keloid                                              | STP705                               | 0/1        |
|                               | Scar prevention                                     | LEM-S401: 0/1                        | 0/3        |
|                               |                                                     | BMT101: 0/1                          |            |
|                               |                                                     | OLX10010: 0/1                        |            |
| <b>Gastrointestinal tract</b> |                                                     |                                      | <b>1/0</b> |
|                               | Chrons Disease                                      | STNM01                               | 1/0        |
| <b>Lipid-tissue</b>           |                                                     |                                      | <b>0/1</b> |
|                               | Decrease inflammation to decrease abdominal obesity | STP705                               | 0/1        |



**Table S7: Approved RNAi therapeutics.** Characteristics of five FDA and EMA approved RNAi-based drugs: Parisiran, Givosiran, Lumasiran, Inclisiran, Vutrisiran

|                                                                   | <b>Parisiran</b>                             | <b>Givosiran</b>             | <b>Lumasiran</b>             | <b>Inclisiran</b>     | <b>Vutrisiran</b> |
|-------------------------------------------------------------------|----------------------------------------------|------------------------------|------------------------------|-----------------------|-------------------|
| <b>Year of approval by FDA and EMA</b>                            | 2018                                         | 2019                         | 2020                         | 2021                  | 2022              |
| <b>Disease</b>                                                    | Hereditary Transthyretin Amyloidosis (hATTR) | Acute Intermittent Porphyria | Primary Hyperoxaluria Type 1 | Hypercholesterolaemia | hATTR             |
| <b>Delivery</b>                                                   | Nanoparticle                                 | Naked                        | Naked                        | Naked                 | Naked             |
| <b>Type of delivery</b>                                           | LNP                                          | GalNAc conjugate             | GalNAc conjugate             | GalNAc conjugate      | GalNAc conjugate  |
| <b>Type of RNAi</b>                                               | siRNA                                        | siRNA                        | siRNA                        | siRNA                 | siRNA             |
| <b>Administration</b>                                             | Intravenous                                  | Subcutaneous                 | Subcutaneous                 | Subcutaneous          | Subcutaneous      |
| <b>Gene target</b>                                                | TTR                                          | ALAS1                        | HAO1                         | PCSK9                 | TTR               |
| <b>Number of trials included in the published clinical trials</b> | 5                                            | 5                            | 4                            | 15                    | 1                 |
| <b>Number of trials included in the ongoing clinical trials</b>   | 1                                            | 0                            | 4                            | 6                     | 1                 |

**Table S8: PRISMA 2020 statement checklist.**

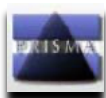

**PRISMA 2020 Checklist**

| Section and Topic             | Item # | Checklist item                                                                                                                                                                                                                                                                                       | Location where item is reported  |
|-------------------------------|--------|------------------------------------------------------------------------------------------------------------------------------------------------------------------------------------------------------------------------------------------------------------------------------------------------------|----------------------------------|
| <b>TITLE</b>                  |        |                                                                                                                                                                                                                                                                                                      |                                  |
| Title                         | 1      | Identify the report as a systematic review.                                                                                                                                                                                                                                                          | Title page                       |
| <b>ABSTRACT</b>               |        |                                                                                                                                                                                                                                                                                                      |                                  |
| Abstract                      | 2      | See the PRISMA 2020 for Abstracts checklist.                                                                                                                                                                                                                                                         | Page 2-3                         |
| <b>INTRODUCTION</b>           |        |                                                                                                                                                                                                                                                                                                      |                                  |
| Rationale                     | 3      | Describe the rationale for the review in the context of existing knowledge.                                                                                                                                                                                                                          | Page 4                           |
| Objectives                    | 4      | Provide an explicit statement of the objective(s) or question(s) the review addresses.                                                                                                                                                                                                               | Page 4                           |
| <b>METHODS</b>                |        |                                                                                                                                                                                                                                                                                                      |                                  |
| Eligibility criteria          | 5      | Specify the inclusion and exclusion criteria for the review and how studies were grouped for the syntheses.                                                                                                                                                                                          | Page 6 and Supplemental material |
| Information sources           | 6      | Specify all databases, registers, websites, organisations, reference lists and other sources searched or consulted to identify studies. Specify the date when each source was last searched or consulted.                                                                                            | Page 6                           |
| Search strategy               | 7      | Present the full search strategies for all databases, registers and websites, including any filters and limits used.                                                                                                                                                                                 | Supplementary material           |
| Selection process             | 8      | Specify the methods used to decide whether a study met the inclusion criteria of the review, including how many reviewers screened each record and each report retrieved, whether they worked independently, and if applicable, details of automation tools used in the process.                     | Page 6, Supplemental material    |
| Data collection process       | 9      | Specify the methods used to collect data from reports, including how many reviewers collected data from each report, whether they worked independently, any processes for obtaining or confirming data from study investigators, and if applicable, details of automation tools used in the process. | Page 6 and Supplemental material |
| Data items                    | 10a    | List and define all outcomes for which data were sought. Specify whether all results that were compatible with each outcome domain in each study were sought (e.g. for all measures, time points, analyses), and if not, the methods used to decide which results to collect.                        | Supplemental material            |
|                               | 10b    | List and define all other variables for which data were sought (e.g. participant and intervention characteristics, funding sources). Describe any assumptions made about any missing or unclear information.                                                                                         | Supplemental material            |
| Study risk of bias assessment | 11     | Specify the methods used to assess risk of bias in the included studies, including details of the tool(s) used, how many reviewers assessed each study and whether they worked independently, and if applicable, details of automation tools used in the process.                                    | Not relevant                     |
| Effect measures               | 12     | Specify for each outcome the effect measure(s) (e.g. risk ratio, mean difference) used in the synthesis or presentation of results.                                                                                                                                                                  | Page 6                           |
| Synthesis methods             | 13a    | Describe the processes used to decide which studies were eligible for each synthesis (e.g. tabulating the study intervention characteristics and comparing against the planned groups for each synthesis (item #5)).                                                                                 | Page 6 and Supplemental          |

| Section and Topic             | Item # | Checklist item                                                                                                                                                                                                                                                                       | Location where item is reported  |
|-------------------------------|--------|--------------------------------------------------------------------------------------------------------------------------------------------------------------------------------------------------------------------------------------------------------------------------------------|----------------------------------|
|                               |        |                                                                                                                                                                                                                                                                                      | material                         |
|                               | 13b    | Describe any methods required to prepare the data for presentation or synthesis, such as handling of missing summary statistics, or data conversions.                                                                                                                                | Page 6                           |
|                               | 13c    | Describe any methods used to tabulate or visually display results of individual studies and syntheses.                                                                                                                                                                               | Supplemental material            |
|                               | 13d    | Describe any methods used to synthesize results and provide a rationale for the choice(s). If meta-analysis was performed, describe the model(s), method(s) to identify the presence and extent of statistical heterogeneity, and software package(s) used.                          | Page 6 and Supplemental material |
|                               | 13e    | Describe any methods used to explore possible causes of heterogeneity among study results (e.g. subgroup analysis, meta-regression).                                                                                                                                                 | Not relevant                     |
|                               | 13f    | Describe any sensitivity analyses conducted to assess robustness of the synthesized results.                                                                                                                                                                                         | Not relevant                     |
| Reporting bias assessment     | 14     | Describe any methods used to assess risk of bias due to missing results in a synthesis (arising from reporting biases).                                                                                                                                                              | Not relevant                     |
| Certainty assessment          | 15     | Describe any methods used to assess certainty (or confidence) in the body of evidence for an outcome.                                                                                                                                                                                | Not relevant                     |
| <b>RESULTS</b>                |        |                                                                                                                                                                                                                                                                                      |                                  |
| Study selection               | 16a    | Describe the results of the search and selection process, from the number of records identified in the search to the number of studies included in the review, ideally using a flow diagram.                                                                                         | Figure S1                        |
|                               | 16b    | Cite studies that might appear to meet the inclusion criteria, but which were excluded, and explain why they were excluded.                                                                                                                                                          | Not relevant                     |
| Study characteristics         | 17     | Cite each included study and present its characteristics.                                                                                                                                                                                                                            | Not relevant                     |
| Risk of bias in studies       | 18     | Present assessments of risk of bias for each included study.                                                                                                                                                                                                                         | Not relevant                     |
| Results of individual studies | 19     | For all outcomes, present, for each study: (a) summary statistics for each group (where appropriate) and (b) an effect estimate and its precision (e.g. confidence/credible interval), ideally using structured tables or plots.                                                     | Not relevant                     |
| Results of syntheses          | 20a    | For each synthesis, briefly summarise the characteristics and risk of bias among contributing studies.                                                                                                                                                                               | Not relevant                     |
|                               | 20b    | Present results of all statistical syntheses conducted. If meta-analysis was done, present for each the summary estimate and its precision (e.g. confidence/credible interval) and measures of statistical heterogeneity. If comparing groups, describe the direction of the effect. | Not relevant                     |
|                               | 20c    | Present results of all investigations of possible causes of heterogeneity among study results.                                                                                                                                                                                       | Not relevant                     |
|                               | 20d    | Present results of all sensitivity analyses conducted to assess the robustness of the synthesized results.                                                                                                                                                                           | Not relevant                     |
| Reporting biases              | 21     | Present assessments of risk of bias due to missing results (arising from reporting biases) for each synthesis assessed.                                                                                                                                                              | Not relevant                     |
| Certainty of evidence         | 22     | Present assessments of certainty (or confidence) in the body of evidence for each outcome assessed.                                                                                                                                                                                  | Not relevant                     |
| <b>DISCUSSION</b>             |        |                                                                                                                                                                                                                                                                                      |                                  |
| Discussion                    | 23a    | Provide a general interpretation of the results in the context of other evidence.                                                                                                                                                                                                    | Page 10-11                       |
|                               | 23b    | Discuss any limitations of the evidence included in the review.                                                                                                                                                                                                                      | Page 14                          |
|                               | 23c    | Discuss any limitations of the review processes used.                                                                                                                                                                                                                                | Page 14                          |

| Section and Topic                              | Item # | Checklist item                                                                                                                                                                                                                             | Location where item is reported  |
|------------------------------------------------|--------|--------------------------------------------------------------------------------------------------------------------------------------------------------------------------------------------------------------------------------------------|----------------------------------|
|                                                | 23d    | Discuss implications of the results for practice, policy, and future research.                                                                                                                                                             | Page 14                          |
| <b>OTHER INFORMATION</b>                       |        |                                                                                                                                                                                                                                            |                                  |
| Registration and protocol                      | 24a    | Provide registration information for the review, including register name and registration number, or state that the review was not registered.                                                                                             | Page 5                           |
|                                                | 24b    | Indicate where the review protocol can be accessed, or state that a protocol was not prepared.                                                                                                                                             | Page 5 and Supplemental material |
|                                                | 24c    | Describe and explain any amendments to information provided at registration or in the protocol.                                                                                                                                            | Not relevant                     |
| Support                                        | 25     | Describe sources of financial or non-financial support for the review, and the role of the funders or sponsors in the review.                                                                                                              | Title page                       |
| Competing interests                            | 26     | Declare any competing interests of review authors.                                                                                                                                                                                         | Title page                       |
| Availability of data, code and other materials | 27     | Report which of the following are publicly available and where they can be found: template data collection forms; data extracted from included studies; data used for all analyses; analytic code; any other materials used in the review. | Not relevant                     |

From: Page MJ, McKenzie JE, Bossuyt PM, Boutron I, Hoffmann TC, Mulrow CD, et al. The PRISMA 2020 statement: an updated guideline for reporting systematic reviews. *BMJ* 2021;372:n71. doi: 10.1136/bmj.n71  
For more information, visit: <http://www.prisma-statement.org/>

Table S9: Extraction protocol.

| Variable                       | Categories           | Definition of the variable                                                                                                                                                                                                                                                                                                                                                                                                                                                                                        |
|--------------------------------|----------------------|-------------------------------------------------------------------------------------------------------------------------------------------------------------------------------------------------------------------------------------------------------------------------------------------------------------------------------------------------------------------------------------------------------------------------------------------------------------------------------------------------------------------|
| <b>Article characteristics</b> |                      |                                                                                                                                                                                                                                                                                                                                                                                                                                                                                                                   |
| Title, Journal, Authors        | -                    | Variables are filled out in spreadsheet automatically. <b>Important: Check that the variables correspond to the downloaded article to make sure you are extracting from the correct article.</b><br><br>The journal name for a specific journal may differ in the spreadsheet; should just be ignored. May be due to retrieval from different data bases (PubMed and Embase).                                                                                                                                     |
| Name of last author            | -                    | Enter full name                                                                                                                                                                                                                                                                                                                                                                                                                                                                                                   |
| Name of first author           | -                    | Enter full name                                                                                                                                                                                                                                                                                                                                                                                                                                                                                                   |
| Year of publication            | 1998-2023            | Years corresponding to search period.<br><br>Choose year of reference publication <b>not epub</b> from drop down options.                                                                                                                                                                                                                                                                                                                                                                                         |
| Study setting (Country)        | Categorical variable | Enter the English name of the country where the study was conducted (use this alphabetical list of countries; the spreadsheet should save the name of a country after first entry: <a href="https://www.worldometers.info/geography/alphabetical-list-of-countries/">https://www.worldometers.info/geography/alphabetical-list-of-countries/</a> ). Start with capital letter; make sure spelling is correct. The country should be selected based on the country corresponding to the last author’s affiliation. |
| Name of drug                   | -                    | Enter name                                                                                                                                                                                                                                                                                                                                                                                                                                                                                                        |

|                  |                                                |                                                                                                                                            |
|------------------|------------------------------------------------|--------------------------------------------------------------------------------------------------------------------------------------------|
| Disease          | -                                              | Enter disease                                                                                                                              |
| Target           | Name of gene                                   | E.g. "TTR" ( <a href="https://www.genecards.org/cgi-bin/carddisp.pl?gene=TTR">https://www.genecards.org/cgi-bin/carddisp.pl?gene=TTR</a> ) |
| Delivery         | Nanoparticle<br>Naked<br>Viral vector<br>Other |                                                                                                                                            |
| Type of delivery | Description of delivery platform               | E.g. Lipid nanoparticle, Lentiviral vector, Cholesterol-conjugated                                                                         |
| Type             | siRNA<br>miRNA<br>shRNA<br>miR-shRNA           |                                                                                                                                            |
| Administration   | Description of administration route            | E.g. Intravenous, Subcutaneous, Intranasal, Inhalation                                                                                     |

**Supplemental Document: The full search strategy.** Included are inclusion/exclusion criteria for identification of published/ongoing clinical trials via databases and ClinicalTrials.gov.

**Inclusion criteria:**

Original research articles on RNA interference published between 1998-2023

Human *in vivo* clinical trials

**Exclusion criteria:**

Non-original articles

Articles published before Fire and Mello's 1998-paper<sup>2</sup>.

*In vitro* or *ex vivo* studies

No intervention

**Search engines/databases (assessed December 30, 2022 (Web of Science, PubMed and Embase and January 18, 2023 (ClinicalTrials.gov)):**

Web of Science (All Databases)

Assessed using Google Chrome Version 108.0.5359.124 (Official version) (arm64)

<https://www.webofscience.com/wos/allldb/advanced-search>

PubMed (assessed using Google Chrome Version 108.0.5359.124 (Official version) (arm64)

<https://pubmed.ncbi.nlm.nih.gov>

Embase (assessed using Google Chrome Version 108.0.5359.124 (Official version) (arm64)

<https://www.embase.com/search/quick>

ClinicalTrials.gov

Assessed using Google Chrome Version 108.0.5359.124 (Official version) (arm64)

<https://clinicaltrials.gov>

**Web of Science search strategy (results: 1,016)**

<https://www.webofscience.com/wos/allldb/summary/1b1bdc88-e1ea-4f32-a752-b53bcd7631ba-67e7634c/times-cited-descending/1>

(TI=("RNA interference" OR RNAi\* OR "posttranscriptional gene silencing" OR "post-transcriptional gene silencing" OR "post transcriptional gene silencing" OR PTGS OR "RNA silencing" OR "small interfering RNA\*" OR siRNA\* OR "short hairpin RNA\*" OR "small hairpin RNA\*" OR shRNA\* OR microRNA\* OR miRNA\*) OR AB=("RNA interference" OR RNAi\* OR "posttranscriptional gene silencing" OR "post-transcriptional gene silencing" OR "post transcriptional gene silencing" OR PTGS OR "RNA silencing" OR "small interfering RNA\*" OR siRNA\* OR "short hairpin RNA\*" OR "small hairpin RNA\*" OR shRNA\* OR microRNA\* OR miRNA\*))

Refined by:

Publication Years: 1998-2023

Document Types: Clinical Trial

NOT Document Types: Abstract OR Review Article OR Editorial Material

**PubMed search strategy (results: 1,060)**

("RNA interference"[Title/Abstract] OR RNAi\*[Title/Abstract] OR "posttranscriptional gene silencing"[Title/Abstract] OR "post-transcriptional gene silencing"[Title/Abstract] OR "post transcriptional gene silencing"[Title/Abstract] OR PTGS[Title/Abstract] OR "RNA silencing"[Title/Abstract] OR "small interfering RNA\*" [Title/Abstract] OR siRNA\*[Title/Abstract] OR "short hairpin RNA\*" [Title/Abstract] OR "small hairpin RNA\*" [Title/Abstract] OR shRNA\*[Title/Abstract] OR microRNA\*[Title/Abstract] OR miRNA\*[Title/Abstract]) AND ("1998/01/01"[Date - Publication] : "2023/12/31"[Date - Publication]) AND (clinicaltrial[Filter] OR clinicaltrialphasei[Filter] OR clinicaltrialphaseii[Filter] OR clinicaltrialphaseiii[Filter] OR clinicaltrialphaseiv[Filter] OR controlledclinicaltrial[Filter]) NOT ("review"[Publication Type] OR "editorial"[Publication Type])

**Embase search strategy (results: 647)**

('rna interference':ab,ti OR 'rna\*':ab,ti OR 'posttranscriptional gene silencing':ab,ti OR 'post-transcriptional gene silencing':ab,ti OR 'post transcriptional gene silencing':ab,ti OR 'ptgs':ab,ti OR 'rna silencing':ab,ti OR 'small interfering rna\*':ab,ti OR 'sirna\*':ab,ti OR 'short hairpin rna\*':ab,ti OR 'small hairpin rna\*':ab,ti OR 'shrna\*':ab,ti OR 'microna\*':ab,ti OR 'mirna\*':ab,ti) AND [01-01-1998]/sd NOT [31-12-2023]/sd AND ('clinical trial'/de OR 'controlled clinical trial'/de OR 'phase 1 clinical trial'/de OR 'phase 2 clinical trial'/de OR 'phase 3 clinical trial'/de OR 'phase 4 clinical trial'/de) NOT ('conference abstract'/it OR 'conference paper'/it OR 'conference review'/it OR 'review'/it OR 'editorial'/it OR 'note'/it)

**ClinicalTrials.gov search strategy (results: 450):**

Other terms (Recruiting, Enrolling by invitation, Active, not recruiting): "RNA interference" OR RNAi OR "small interfering RNA" OR siRNA OR "short hairpin RNA" OR "small hairpin RNA" OR shRNA OR microRNA OR miRNA



## References

1. Page MJ, McKenzie JE, Bossuyt PM, Boutron I, Hoffmann TC, Mulrow CD, Shamseer L, Tetzlaff JM, Akl EA, Brennan SE, et al. (2021). The PRISMA 2020 statement: an updated guideline for reporting systematic reviews. *BMJ* 372: n71.
2. Fire A, Xu S, Montgomery MK, Kostas SA, Driver SE, and Mello CC (1998). Potent and specific genetic interference by double-stranded RNA in *Caenorhabditis elegans*. *Nature* 391: 806-811.
